# Supplementary material for: Pathogenesis of Alzheimer’s disease: Involvement of the Choroid Plexus
Source: bioRxiv or medRxiv preprint supplement (doi:10.1101/2021.07.29.21260696), 2021-12-16

FIGURE S3  
A

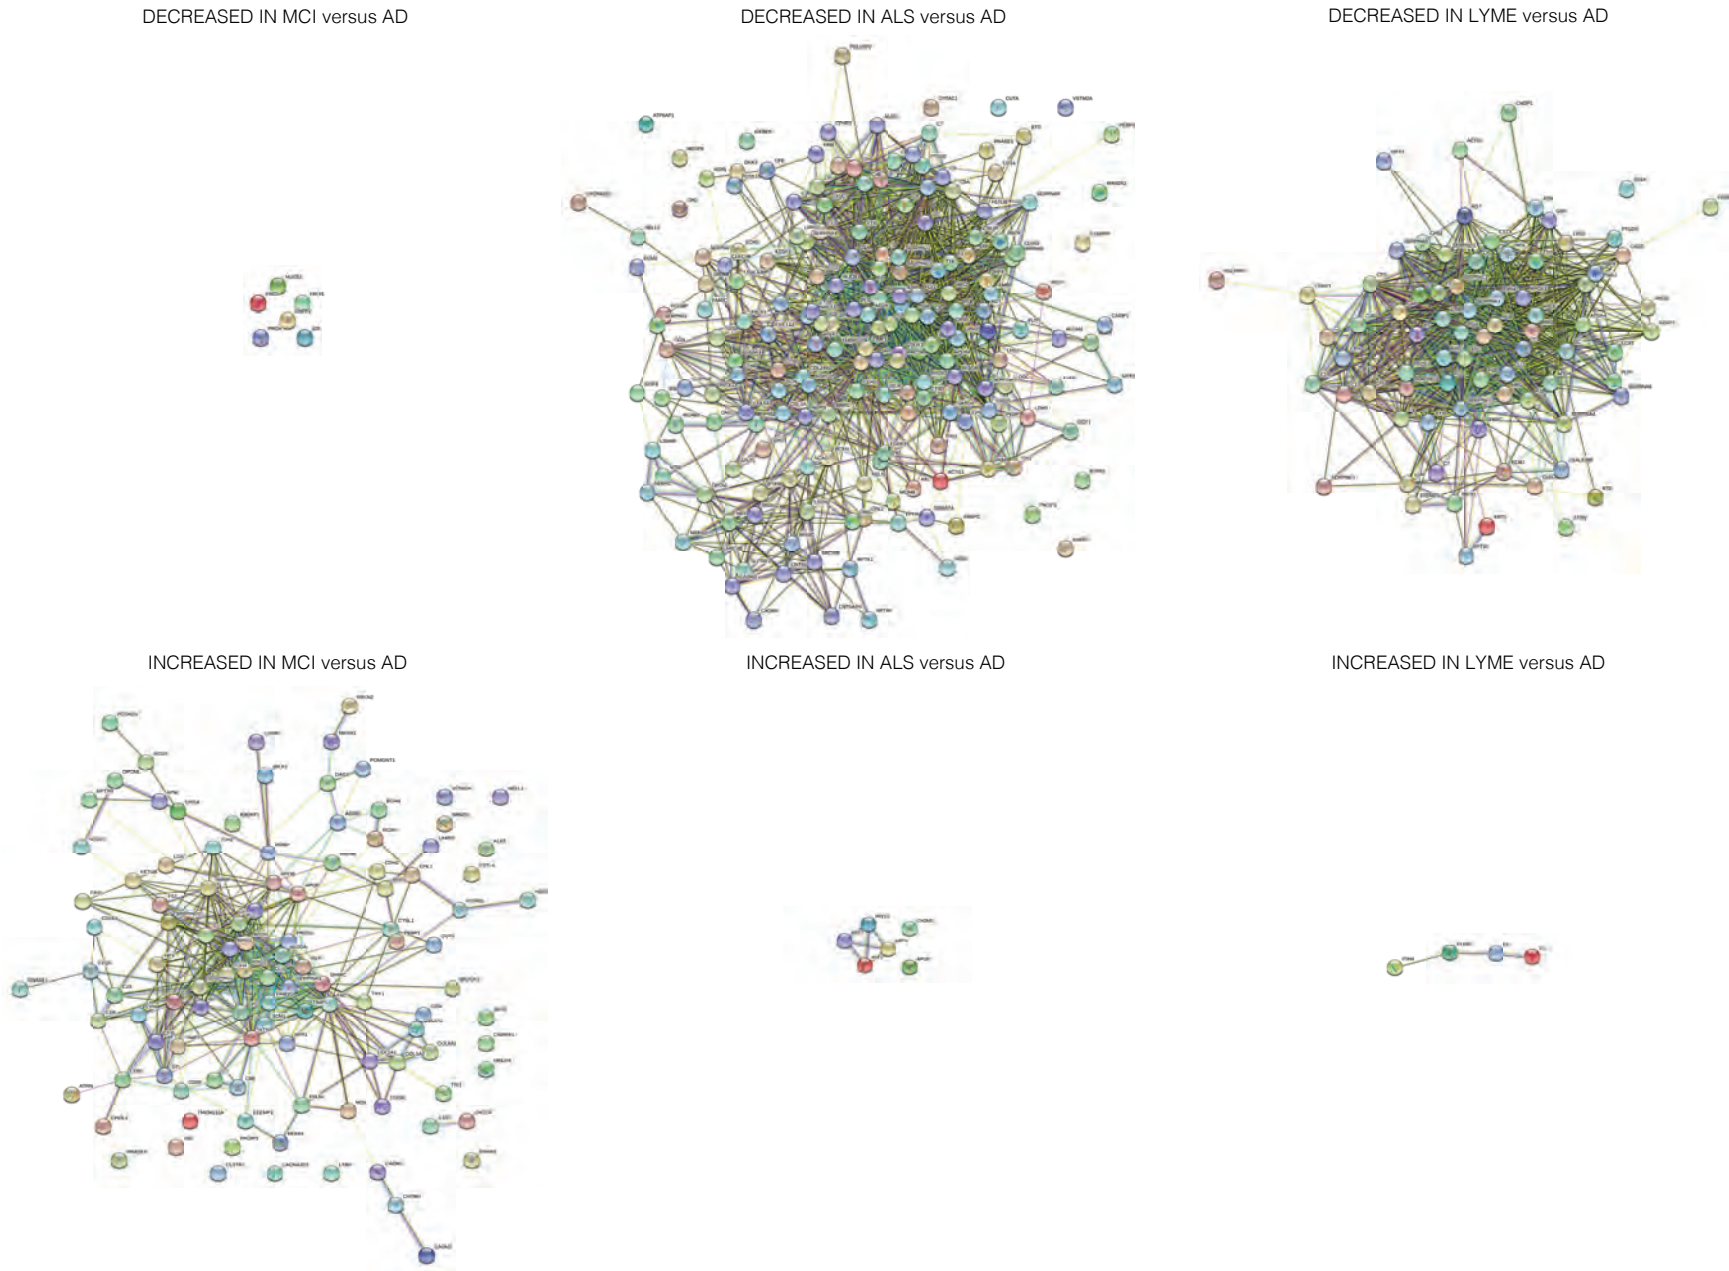

B

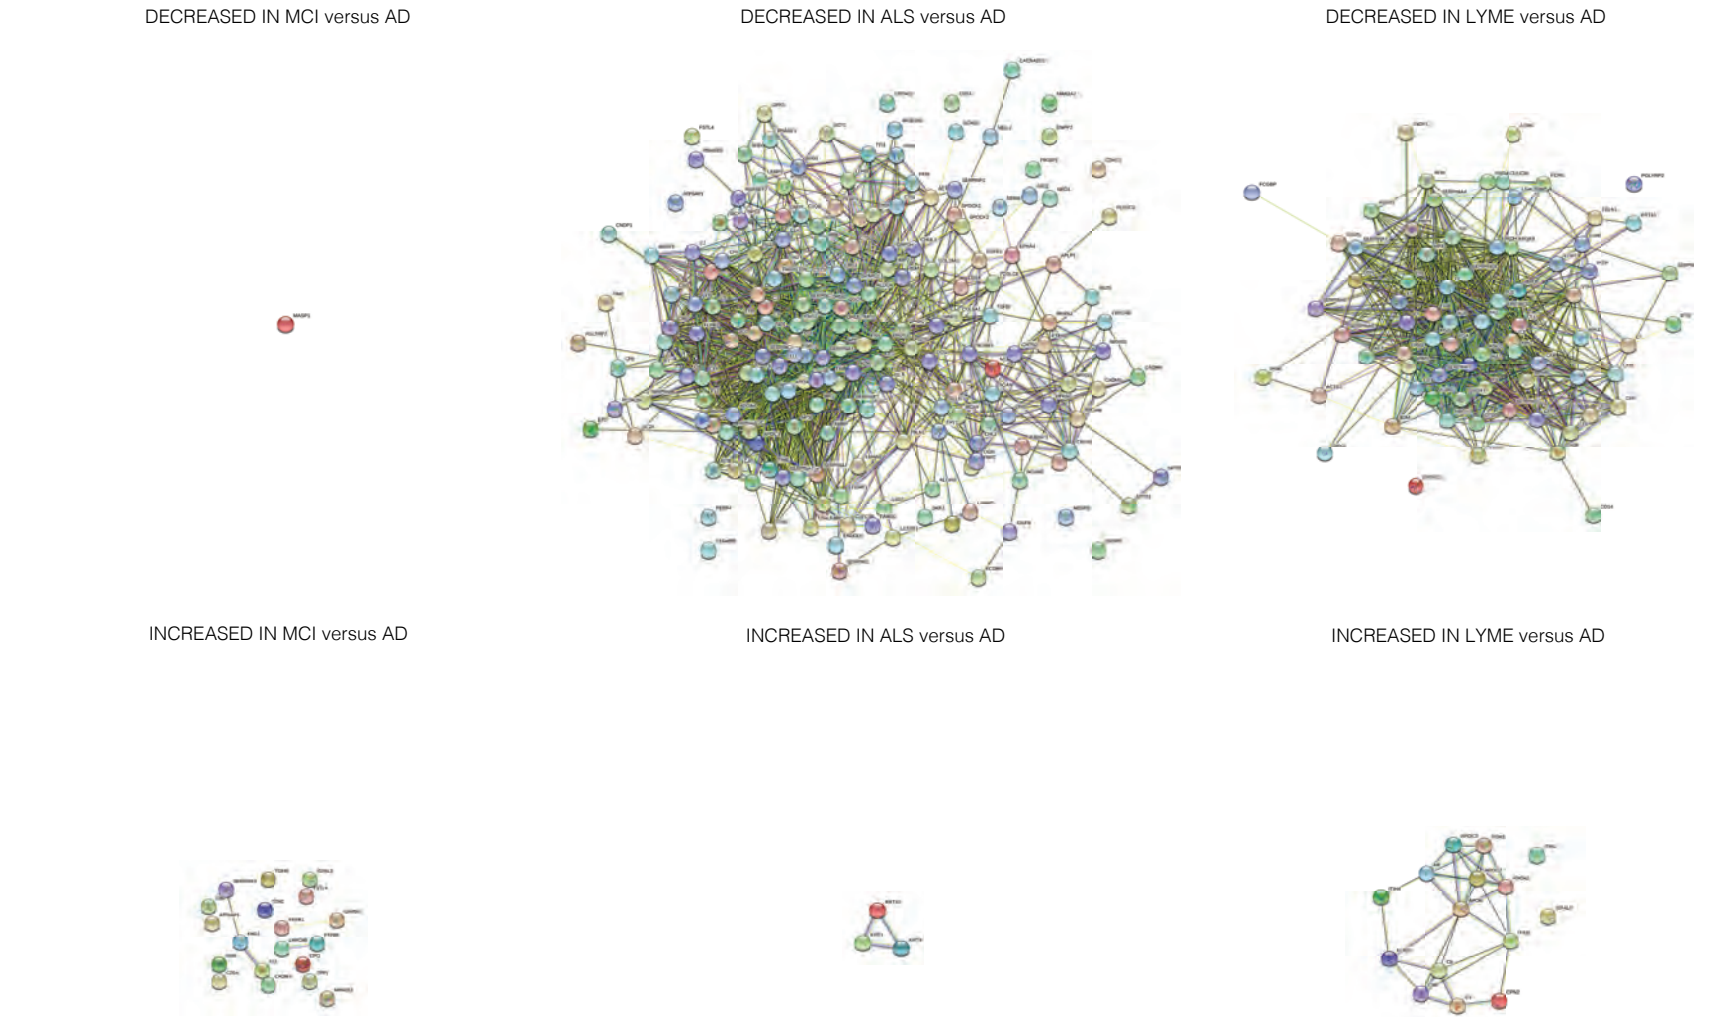

Supplement: Supplementary file [file media-3.pdf]
